# Supplementary material for: Camptothecin-loaded supramolecular nanodelivery system based on amphiphilic calix[4]arene for targeted tumor therapy
Source: Royal Society of Chemistry journal article supplement (doi:10.1039/d3nj03289b), 2023-12-06
Supplement: d3nj03289b1.pdf [file d3nj03289b1.pdf]

## Electronic Supplementary Information

### Camptothecin-loaded supramolecular nano-delivery system based on amphiphilic calix[4]arene for targeted tumor therapy

Han-yuan Zheng, ‡<sup>a,b</sup> Yu-dun Liu, ‡<sup>a,b</sup> Yu-lei Zhang, <sup>a,b</sup> Qing-hua Shi, <sup>a,b</sup> Xue-li Hou, <sup>a,b</sup> Lin An\*<sup>a,b</sup>

<sup>a</sup> College of Pharmacy, Xuzhou Medical University, Xuzhou 221004, P. R. China

<sup>b</sup> Jiangsu Key Laboratory of New Drug Research and Clinical Pharmacy, Xuzhou Medical University, Xuzhou 221004, P. R. China

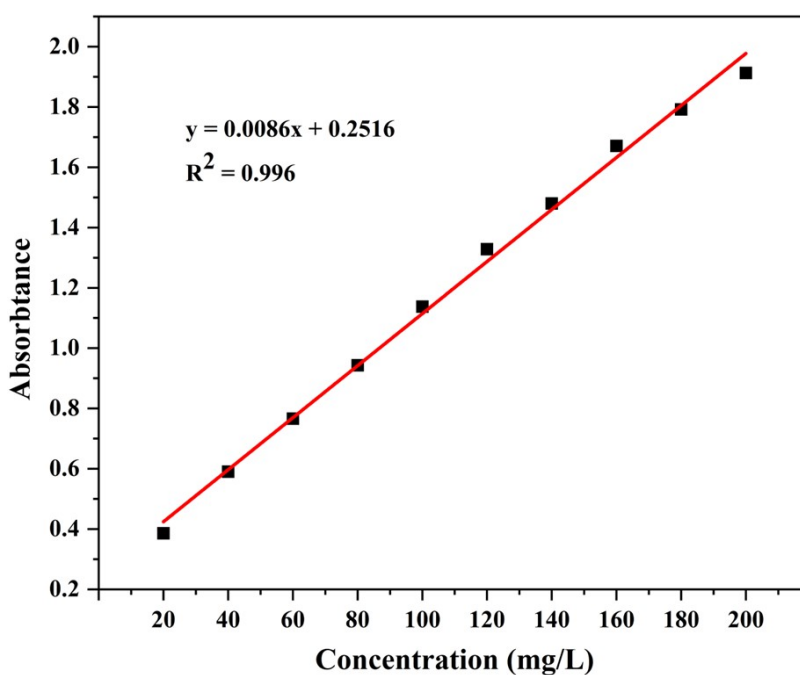

Figure S1. UV Standard Curve of Camptothecin.

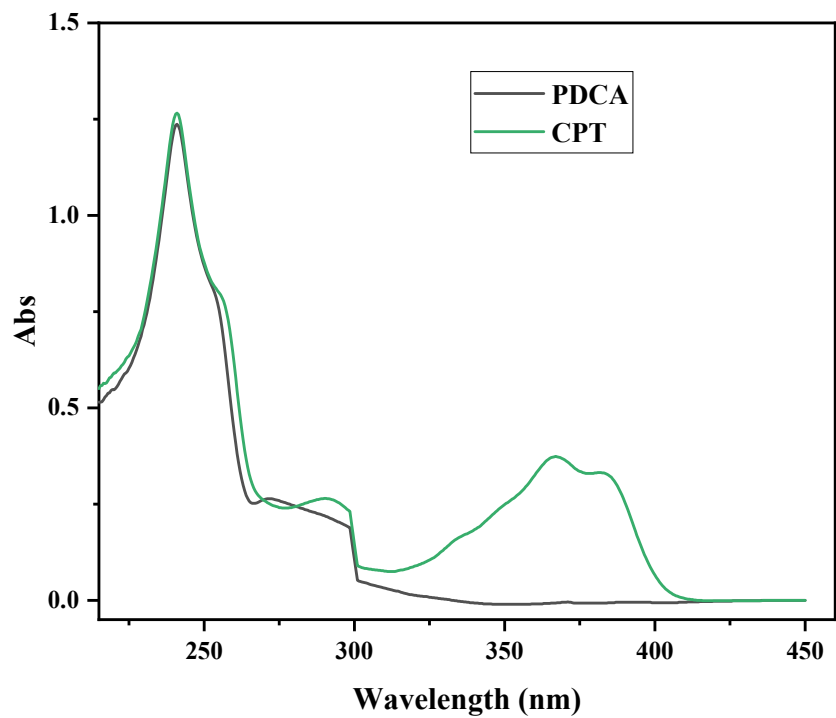

Figure S2. UV-Vis spectrum of PDCA, CPT at the concentration of 20  $\mu\text{M}$  in DMSO.

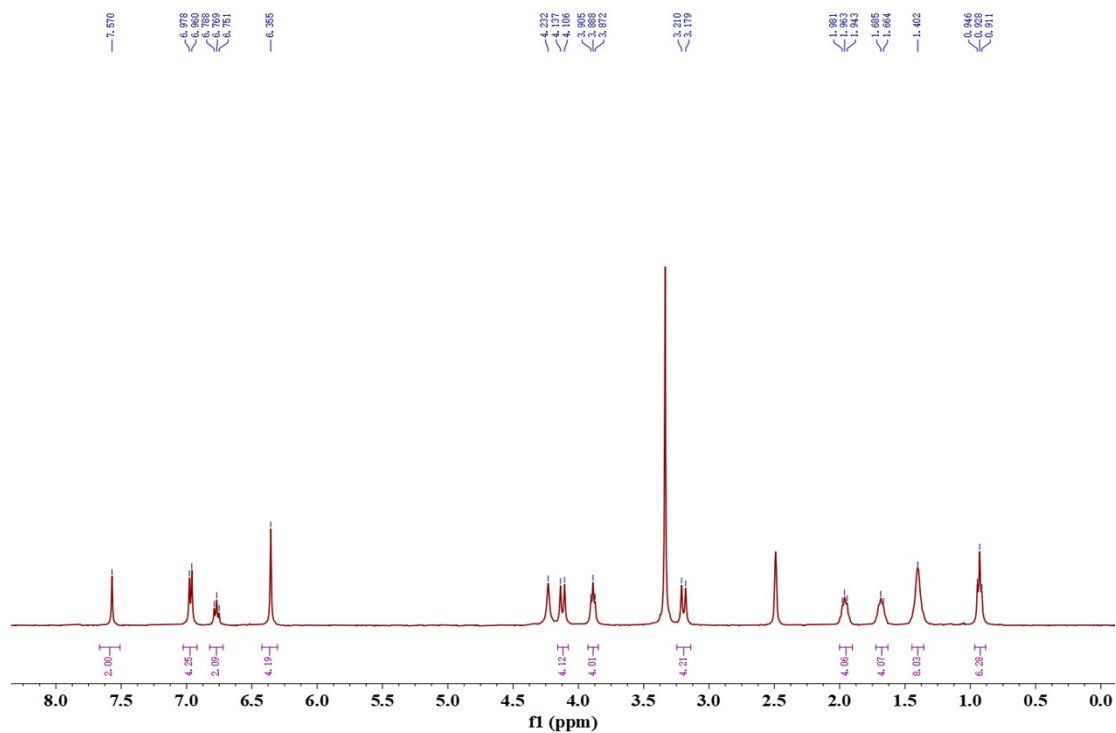

Figure S3.  $^1\text{H}$  NMR spectrum of compound ADCA.

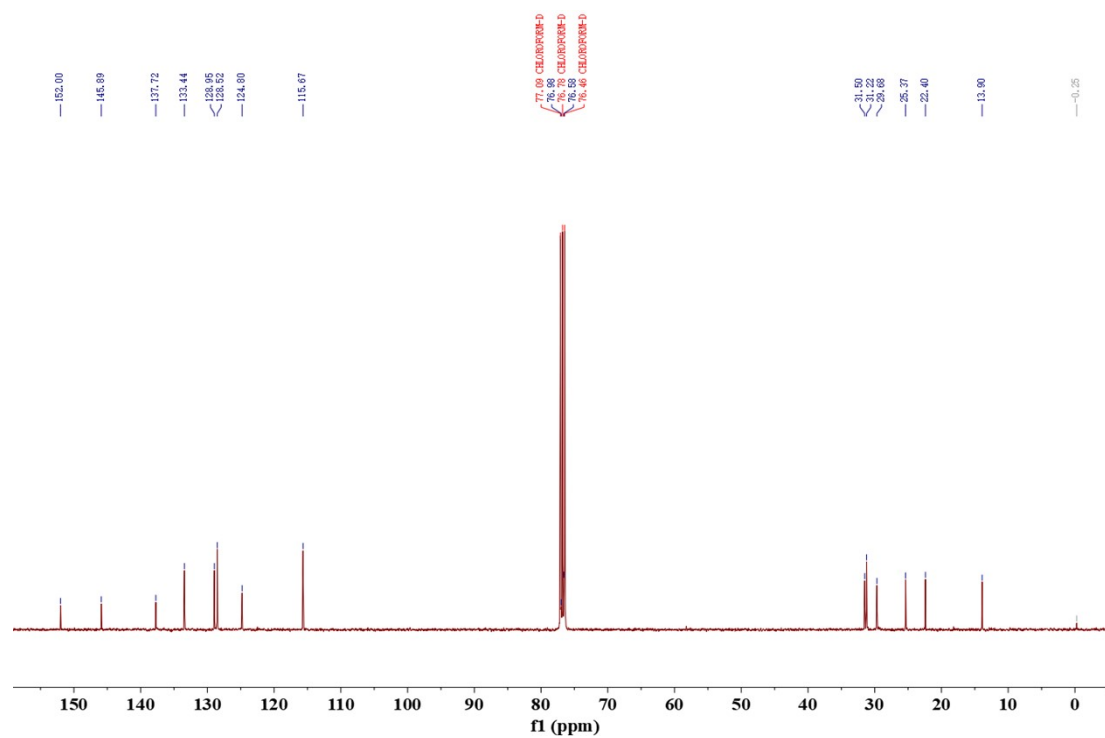

Figure S4. <sup>13</sup>C NMR spectrum of compound ADCA.

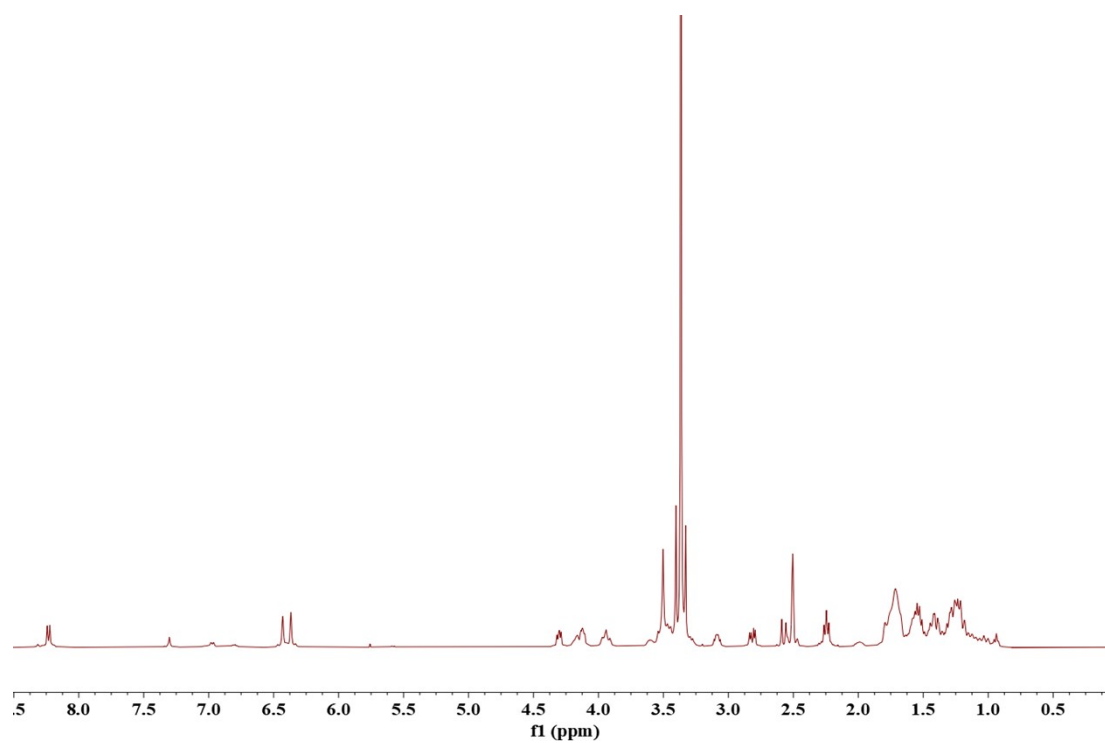

Figure S5. <sup>1</sup>H NMR spectrum of compound PDCA.

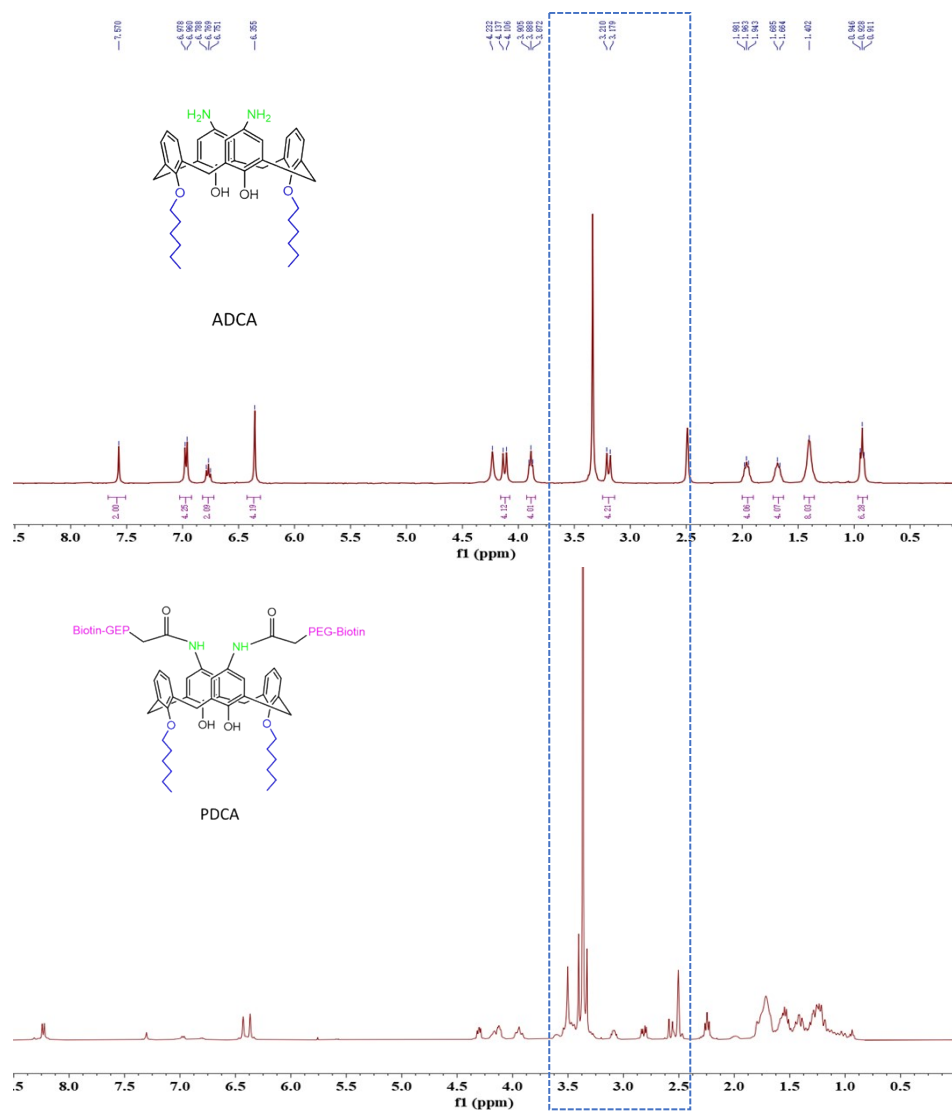

**Figure S6. Comparison of the <sup>1</sup>H NMR spectra of the compounds ADCA and PDCA.**
